# Supplementary material
Source: Springer Nature journal article supplement (https://www.springermedizin.de/resource/supplementary/12865_2008_229_MOESM3_ESM.pdf/9427682)

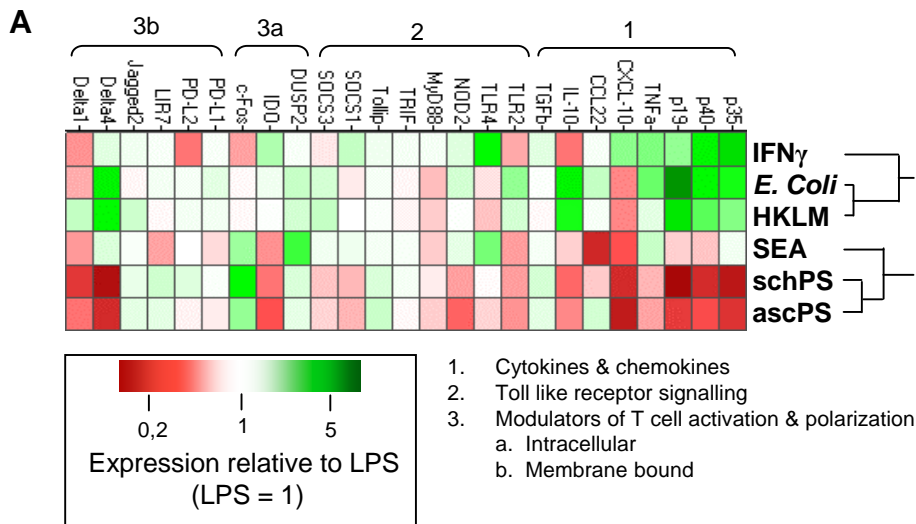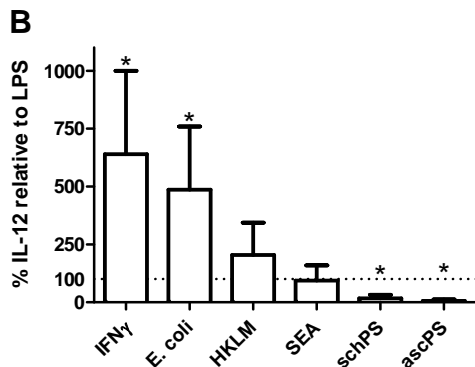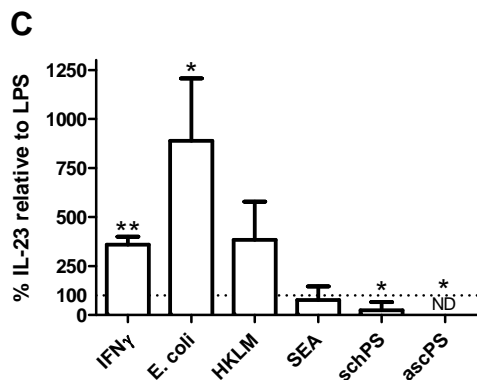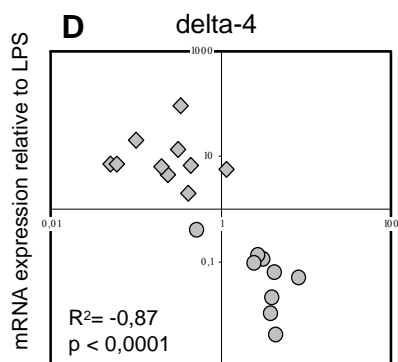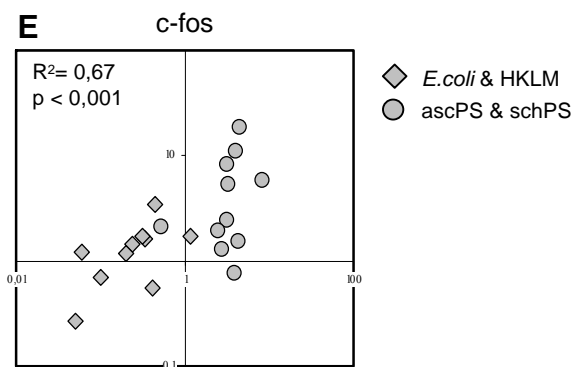

T cell IL4 / IFN- $\gamma$  ratio relative to LPS

Supplement: MOESM3 [file 9427682]
